# Supplementary material for: Reaction of [η1:η5-(Me2NCH2CH2)C2B9H10]TaMe3 with aryl isonitriles: tantallacarborane-mediated facile cleavage of C–N multiple bonds
Source: Royal Society of Chemistry journal article supplement (doi:10.1039/c3cc44446e), 2013-01-01
Supplement: c3cc44446e.pdf [file c3cc44446e.pdf]

# Supporting Information

## Reaction of $[\eta^1:\eta^5-(\text{Me}_2\text{NCH}_2\text{CH}_2)\text{C}_2\text{B}_9\text{H}_{10}]\text{TaMe}_3$ with aryl isonitriles: tantallacarborane-mediated facile cleavage of C-N multiple bond

Li Xiang,<sup>a</sup> Kazushi Mashima,<sup>b</sup> and Zuowei Xie\*<sup>a</sup>

<sup>a</sup> Department of Chemistry and State Key Laboratory of Synthetic Chemistry, The Chinese University of Hong Kong, Shatin, New Territories, Hong Kong, China

<sup>b</sup> Department of Chemistry, Graduate School of Engineering Science, Osaka University, Toyonaka, Osaka 560-8531, Japan, and CREST, JST, Japan

### Table of Contents

|                                                            |    |
|------------------------------------------------------------|----|
| Experimental Section                                       | S2 |
| References                                                 | S7 |
| Crystal Data and Summary of Data Collection and Refinement | S8 |

**General Procedures.** All reactions and manipulations were carried out under an argon atmosphere with the rigid exclusion of air and moisture using standard Schlenk or cannula techniques, or by working in an argon-filled glovebox.  $^1\text{H}$  NMR spectra were recorded on a Bruker DPX 400 spectrometer at 400 MHz.  $^{13}\text{C}\{^1\text{H}\}$  NMR spectra were recorded on a Bruker DPX 400 spectrometer at 100 MHz.  $^{11}\text{B}$  NMR spectra were recorded on a Bruker DPX 400 spectrometer at 128 MHz. All chemical shifts were reported in  $\delta$  units with references to the residual solvent resonance of the deuterated solvents for proton and carbon chemical shifts, and to external  $\text{BF}_3\cdot\text{OEt}_2$  (0.00 ppm) for boron chemical shifts. Infrared spectrum was obtained from KBr pellets prepared in the glovebox on a Perkin-Elmer 1600 Fourier transform spectrometer. Elemental analyses were performed by the Shanghai Institute of Organic Chemistry, CAS, China. All organic solvents were freshly distilled from sodium benzophenone ketyl immediately prior to use. Complexes  $\text{TaMe}_3\text{Cl}_2$ ,<sup>1</sup> 2,6-diisopropylphenyl isonitrile<sup>2</sup> and 7- $\text{Me}_2\text{NHCH}_2\text{CH}_2$ -7,8- $\text{C}_2\text{B}_9\text{H}_{11}$ <sup>3</sup> were prepared according to literature procedures. All other chemicals were purchased from either Aldrich or Acros Chemical Co. and used as received unless otherwise specified.

**Preparation of  $[\eta^1:\eta^5\text{-(Me}_2\text{NCH}_2\text{CH}_2\text{)}\text{C}_2\text{B}_9\text{H}_{10}]\text{TaMe}_3$  (**1**).** To a THF solution (20 mL) of 7- $\text{Me}_2\text{NHCH}_2\text{CH}_2$ -7,8- $\text{C}_2\text{B}_9\text{H}_{11}$  (103 mg, 0.5 mmol) was added an excess amount of NaH (36 mg, 1.5 mmol), and the reaction mixture was heated to reflux for 6 h. After removal of the excess NaH by filtration, the clear solution was added to a THF solution (10 mL) of  $\text{Me}_3\text{TaCl}_2$  (148 mg, 0.5 mmol) at  $-30\text{ }^\circ\text{C}$  with stirring. The mixture was stirred at room temperature for 3 h and filtered. The filtrate was concentrated to about 3 mL, from which complex **1** was isolated as yellow crystals after this solution stood at  $-30\text{ }^\circ\text{C}$  overnight (200 mg, 93%).  $^1\text{H}$  NMR (400 MHz,  $\text{C}_6\text{D}_6$ ):  $\delta$  3.11 (s, 1H) (cage H), 2.11 (m, 1H) (NCHH), 2.06 (s, 3H) ( $\text{TaCH}_3$ ), 1.79 (s, 3H) ( $\text{NMe}(\text{CH}_3)$ ), 1.64 (m, 4H) ( $\text{NMe}(\text{CH}_3)$  and CHH), 1.50 (m, 4H) ( $\text{TaCH}_3$  and CHH), 1.37 (m, 1H) (NCHH), 1.05 (s, 3H) ( $\text{TaCH}_3$ ).  $^{13}\text{C}\{^1\text{H}\}$  NMR (100 MHz,  $\text{C}_6\text{D}_6$ ):  $\delta$  85.7, 83.3, 81.5 ( $\text{TaCH}_3$ ), 65.8 (NCH<sub>2</sub>), 56.7 (cage C),

52.7, 49.8 (NMe(CH<sub>3</sub>)), 35.4 (CH<sub>2</sub>). <sup>11</sup>B{<sup>1</sup>H} NMR (128 MHz, C<sub>6</sub>D<sub>6</sub>): δ 15.6 (1B), 7.9 (1B), 0.5 (1B), -3.0 (1B), -5.2 (2B), -6.2 (1B), -10.0 (1B), -13.4 (1B). <sup>11</sup>B NMR (128 MHz, C<sub>6</sub>D<sub>6</sub>): δ 15.6 (d, *J*<sub>BH</sub> = 127 Hz, 1B), 7.9 (d, *J*<sub>BH</sub> = 150 Hz, 1B), 0.5 (d, *J*<sub>BH</sub> = 150 Hz, 1B), -3.0 (d, *J*<sub>BH</sub> = 142 Hz, 1B), -5.2 (d, *J*<sub>BH</sub> = 120 Hz, 2B), -6.2 (d, *J*<sub>BH</sub> = 105 Hz, 1B), -10.0 (d, *J*<sub>BH</sub> = 169 Hz, 1B), -13.4 (d, *J*<sub>BH</sub> = 147 Hz, 1B). IR (KBr, cm<sup>-1</sup>): ν<sub>BH</sub> 2543 (vs). Anal. Calcd for C<sub>9</sub>H<sub>29</sub>B<sub>9</sub>NTa (**1**): C, 25.04; H, 6.78; N, 3.25. Found: C, 25.01; H, 6.75; N, 3.32.

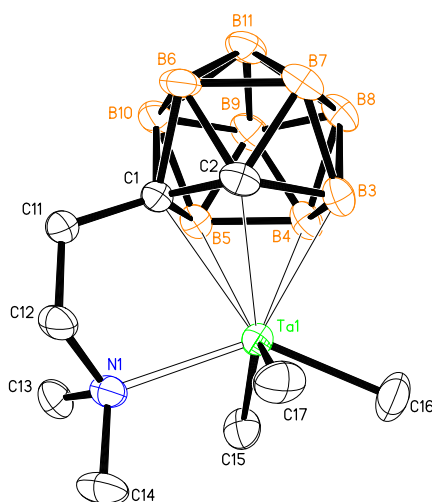

**Figure S1.** Molecular Structure of **1**. Selected bond lengths (Å) and angles (deg): Ta-cent: 2.046, Ta-N1 2.369(3), Ta-C15 2.184(4), Ta-C16 2.198(5), Ta-C17 2.192(4), C15-Ta-N1 82.2(1), C15-Ta-C16 79.9(2), C16-Ta-C17 78.9(2), C17-Ta-N1 79.8(2). cent represents the centroid of the C<sub>2</sub>B<sub>3</sub> ring.

**Preparation of {σ:η<sup>1</sup>:η<sup>5</sup>-[MeN(CH<sub>2</sub>)CH<sub>2</sub>CH<sub>2</sub>](CHMe<sub>2</sub>)C<sub>2</sub>B<sub>9</sub>H<sub>9</sub>}Ta[=N(2,6-Me<sub>2</sub>C<sub>6</sub>H<sub>3</sub>)](THF) (**2**).** To a THF solution (10 mL) of [η<sup>1</sup>:η<sup>5</sup>-(Me<sub>2</sub>NCH<sub>2</sub>CH<sub>2</sub>)C<sub>2</sub>B<sub>9</sub>H<sub>10</sub>]TaMe<sub>3</sub> (**1**; 107 mg, 0.25 mmol) was slowly added a THF (3 mL) solution of 2,6-dimethylphenyl isocyanide (33 mg, 0.25 mmol) at -30 °C, resulting in an immediate color change from yellow to dark purple and finally to orange. The reaction mixture was warmed to room temperature. After filtration, the clear orange solution was concentrated to about 2 mL. Complex **2** was isolated as yellow crystals after this solution stood at

room temperature for 3 days (114 mg, 74%).  $^1\text{H}$  NMR (400 MHz,  $d_5$ -pyridine) for **2a** and **2b**:  $\delta$  7.14 (d,  $J = 7.6$  Hz, 4H) (Ar-*H*), 6.78 (t,  $J = 7.6$  Hz, 2H) (Ar-*H*), 4.03 (s, 2H) (cage *H*), 3.63 (m, 8H) (THF), 3.50 (d,  $J = 8.4$  Hz, 2H) (N(CHH)Ta), 3.35 (m, 2H) (N(CHH)), 3.18 (m, 2H) (N(CHH)), 2.90 (m, 2H) (N(CHH)Ta), 2.64 (s, 6H) (NCH<sub>3</sub>), 2.57 (s, 12H) (Ar-CH<sub>3</sub>), 2.40 (m, 2H) (CHH), 2.32 (m, 2H) (CHH), 2.21 (m, 2H) (BCHMe<sub>2</sub>), 1.59 (m, 8H) (THF), 1.05 (d,  $J = 6.8$  Hz, 6H) (BCH(CH<sub>3</sub>)Me), 0.78 (d,  $J = 7.2$  Hz, 6H) (BCH(CH<sub>3</sub>)Me).  $^1\text{H}$  NMR (400 MHz,  $d_5$ -pyridine) for **2c**:  $\delta$  7.10 (d,  $J = 7.2$  Hz, 2H) (Ar-*H*), 6.84 (t,  $J = 7.6$  Hz, 1H) (Ar-*H*), 3.63 (m, 4H) (THF), 3.35 (m, 1H) (N(CHH)), 3.26 (s, 1H) (cage *H*), 3.09 (m, 1H) (N(CHH)), 2.90 (s, 3H) (NCH<sub>3</sub>), 2.61 (s, 6H) (Ar-CH<sub>3</sub>), 2.50 (d,  $J = 9.2$  Hz, 1H) (N(CHH)Ta), 2.32 (m, 1H) (CHH), 2.21 (m, 1H) (N(CHH)Ta), 2.15 (m, 1H) (CHH), 1.59 (m, 4H) (THF), 0.96 (d,  $J = 7.2$  Hz, 3H) (BCH(CH<sub>3</sub>)Me), 0.33 (d,  $J = 7.2$  Hz, 3H) (BCH(CH<sub>3</sub>)Me), -0.01 (m, 1H) (BCHMe<sub>2</sub>).  $^{13}\text{C}\{^1\text{H}\}$  (100 MHz,  $d_5$ -pyridine) for **2a** and **2b**:  $\delta$  153.3, 129.4, 128.2, 123.1 (Ar-*C*), 69.6 (cage *C*), 67.8 (THF), 67.7 (NCH<sub>2</sub>Ta), 63.4 (NCH<sub>2</sub>), 59.1 (cage *C*), 50.8 (NCH<sub>3</sub>), 36.4 (CH<sub>2</sub>), 26.2 (BCH(CH<sub>3</sub>)Me), 25.8 (THF), 23.1 (BCH(CH<sub>3</sub>)Me), 19.7 (Ar-CH<sub>3</sub>), 16.3 (br, BCHMe<sub>2</sub>).  $^{13}\text{C}\{^1\text{H}\}$  (100 MHz,  $d_5$ -pyridine) for **2c**:  $\delta$  154.3, 128.7, 128.3, 122.8 (Ar-*C*), 69.4 (cage *C*), 67.8 (THF), 63.5 (NCH<sub>2</sub>Ta), 62.4 (NCH<sub>2</sub>), 60.0 (cage *C*), 54.3 (NCH<sub>3</sub>), 37.3 (CH<sub>2</sub>), 27.4 (BCH(CH<sub>3</sub>)Me), 25.8 (THF), 24.7 (BCH(CH<sub>3</sub>)Me), 20.6 (Ar-CH<sub>3</sub>), 15.5 (br, BCHMe<sub>2</sub>).  $^{11}\text{B}\{^1\text{H}\}$  NMR (128 MHz,  $d_5$ -pyridine) for **2**:  $\delta$  3.7 (2B), 2.2 (4B), -5.1 (6B), -6.9 (2B), -8.4 (1B), -10.7 (6B), -14.0 (2B), -17.7 (4B).  $^{11}\text{B}$  NMR (128 MHz,  $d_5$ -pyridine) for **2**:  $\delta$  3.7 (s, 2B), 2.2 (d,  $J_{\text{BH}} = 95$  Hz, 4B), -5.1 (d,  $J_{\text{BH}} = 116$  Hz, 6B), -6.9 (br, unresolved, 2B), -8.4 (br, unresolved, 1B), -10.7 (br, unresolved, 6B), -14.0 (d,  $J_{\text{BH}} = 150$  Hz, 2B), -17.7 (d,  $J_{\text{BH}} = 142$  Hz, 4B). IR (KBr,  $\text{cm}^{-1}$ ):  $\nu_{\text{BH}}$  2554 (vs). Anal. Calcd for C<sub>19</sub>H<sub>38</sub>B<sub>9</sub>N<sub>2</sub>O<sub>0.5</sub>Ta (**2** - 0.5THF): C, 39.29; H, 6.60; N, 4.82. Found: C, 38.99; H, 6.46; N, 4.55.

## Preparation

of

$[\eta^1:\eta^5\text{-(Me}_2\text{NCH}_2\text{CH}_2\text{)(CHMe}_2\text{)C}_2\text{B}_9\text{H}_9\text{]Ta[=N(2,6-Me}_2\text{C}_6\text{H}_3\text{)}][\eta^2\text{-C,N-MeC=N(2,6-Me}_2\text{C}_6\text{H}_3\text{)}$

(3). This complex was prepared as orange crystals from  $[\eta^1:\eta^5-(\text{Me}_2\text{NCH}_2\text{CH}_2)\text{C}_2\text{B}_9\text{H}_{10}]\text{TaMe}_3$  (**1**; 107 mg, 0.25 mmol) and 2,6-dimethylphenyl isocyanide (66 mg, 0.50 mmol) in THF (15 mL) at  $-30$  °C using the same procedures reported for **2**: yield 117 mg (68%).  $^1\text{H}$  NMR (400 MHz,  $d_5$ -pyridine):  $\delta$  7.27 (m, 2H) (Ar-*H*), 7.16 (m, 1H) (Ar-*H*), 7.10 (d,  $J = 7.2$  Hz, 2H) (Ar-*H*), 6.75 (t,  $J = 7.2$  Hz, 1H) (Ar-*H*), 4.12 (m, 1H) (NCHH), 3.09 (s, 3H) (N=CCH<sub>3</sub>), 3.05 (s, 1H) (cage *H*), 2.86 (s, 3H) (Ar-CH<sub>3</sub>), 2.84 (s, 3H) (Ar-CH<sub>3</sub>), 2.76 (m, 7H) (N(CH<sub>3</sub>)<sub>2</sub> and NCHH), 2.63 (m, 1H) (CHH), 2.50 (m, 1H) (CHH), 2.12 (s, 3H) (Ar-CH<sub>3</sub>), 2.06 (s, 3H) (Ar-CH<sub>3</sub>), 1.28 (d,  $J = 6.8$  Hz, 3H) (BCHMe(CH<sub>3</sub>)), 1.16 (m, 1H) (BCHMe<sub>2</sub>), 0.94 (d,  $J = 6.4$  Hz, 3H) (BCHMe(CH<sub>3</sub>)).  $^{13}\text{C}\{^1\text{H}\}$  (100 MHz,  $d_5$ -pyridine):  $\delta$  155.8 (N=CCH<sub>3</sub>), 141.7, 132.9, 131.0, 130.4, 130.3, 129.9, 129.4, 128.7, 128.6, 127.8, 125.8, 122.9 (Ar-C), 72.4 (cage C), 66.9 (NCH<sub>2</sub>), 57.2 (N=CCH<sub>3</sub>), 53.1 (cage C), 49.0 (N(CH<sub>3</sub>)<sub>2</sub>), 38.5 (CH<sub>2</sub>), 27.1, 25.6 (BCH(CH<sub>3</sub>)Me), 22.5, 22.0 (Ar-CH<sub>3</sub>), 19.0, 17.4 (Ar-CH<sub>3</sub>), 17.3 (br, BCHMe<sub>2</sub>).  $^{11}\text{B}\{^1\text{H}\}$  NMR (128 MHz,  $d_5$ -pyridine):  $\delta$  2.6 (1B), 0.8 (2B), -7.6 (1B), -9.5 (2B), -11.4 (2B), -18.1 (1B).  $^{11}\text{B}$  NMR (128 MHz,  $d_5$ -pyridine):  $\delta$  2.6 (s, 1B), 0.8 (d,  $J_{\text{BH}} = 118$  Hz, 2B), -7.6 (br, unresolved, 1B), -9.5 (br, unresolved, 2B), -11.4 (br, unresolved, 2B), -18.1 (d,  $J_{\text{BH}} = 125$  Hz, 1B). IR (KBr,  $\text{cm}^{-1}$ ):  $\nu_{\text{BH}}$  2535 (vs). Anal. Calcd for C<sub>27</sub>H<sub>47</sub>B<sub>9</sub>N<sub>3</sub>Ta (**3**): C, 46.87; H, 6.85; N, 6.07. Found: C, 47.26; H, 6.91; N, 5.69.

### Preparation

of

$\{\eta^1:\eta^5-(\text{Me}_2\text{NCH}_2\text{CH}_2)\text{C}_2\text{B}_9\text{H}_{10}\}\text{Ta}[\text{=N}(2,6\text{-}^i\text{Pr}_2\text{C}_6\text{H}_3)][\eta^2\text{-C,N-MeC=N}(2,6\text{-}^i\text{Pr}_2\text{C}_6\text{H}_3)]$  (**4**). This complex was prepared as yellow crystals from  $[\eta^1:\eta^5-(\text{Me}_2\text{NCH}_2\text{CH}_2)\text{C}_2\text{B}_9\text{H}_{10}]\text{TaMe}_3$  (**1**; 107 mg, 0.25 mmol) and 2,6-diisopropylphenyl isocyanide (140 mg, 0.75 mmol) in THF (15 mL) at  $-30$  °C using the same procedures reported for **2**: yield 103 mg (54%).  $^1\text{H}$  NMR (400 MHz,  $d_5$ -pyridine):  $\delta$  7.45 (m, 2H) (Ar-*H*), 7.33 (d,  $J = 7.6$  Hz, 1H) (Ar-*H*), 7.23 (m, 2H) (Ar-*H*), 6.99 (d,  $J = 7.6$  Hz, 1H) (Ar-*H*), 4.31 (m, 2H) (Ar-CHMe<sub>2</sub>), 4.11 (m, 1H) (NCHH), 3.63 (s, 1H) (cage *H*), 3.31 (s, 3H) (N=CCH<sub>3</sub>), 3.12 (m, 1H) (Ar-CHMe<sub>2</sub>), 3.03 (m, 1H) (NCHH), 2.98 (s, 3H) (NMeCH<sub>3</sub>), 2.93 (m, 1H)

(Ar-CHMe<sub>2</sub>), 2.75 (s, 3H) (NCH<sub>3</sub>Me), 2.62 (m, 2H) (CH<sub>2</sub>), 1.32 (m, 12H) (Ar-CH(CH<sub>3</sub>)<sub>2</sub>), 1.10 (m, 12H) (Ar-CH(CH<sub>3</sub>)<sub>2</sub>). <sup>13</sup>C NMR (100 MHz, *d*<sub>5</sub>-pyridine): δ 152.2 (N=CCH<sub>3</sub>), 144.2, 142.3, 142.2, 142.1, 141.9, 141.8, 138.7, 138.3, 128.9, 128.8, 125.7, 125.6 (Ar-C), 74.0 (cage C), 67.4 (NCH<sub>2</sub>), 56.4 (N=CCH<sub>3</sub>), 50.4 (NCH<sub>3</sub>), 50.0 (cage C), 38.0 (CH<sub>2</sub>), 28.0, 27.9, 27.5, 27.0 (Ar-CHMe<sub>2</sub>), 25.6, 25.2, 23.5, 23.4 (Ar-CH(CH<sub>3</sub>)<sub>2</sub>), 22.0 (NCH<sub>3</sub>). <sup>11</sup>B{<sup>1</sup>H} NMR (128 MHz, *d*<sub>5</sub>-pyridine): δ 1.7 (2B), 0.6 (1B), -6.58 (1B), -9.1 (2B), -9.7 (2B), -16.3 (1B). <sup>11</sup>B NMR (128 MHz, *d*<sub>5</sub>-pyridine): δ 1.7 (d, *J* = 113 Hz, 2B), 0.6 (br, unresolved, 1B), -6.58 (br, unresolved, 1B), -9.1 (br, unresolved, 2B), -9.7 (br, unresolved, 2B), -16.3 (d, *J* = 126 Hz, 1B). IR (KBr, cm<sup>-1</sup>): ν<sub>BH</sub> 2537 (vs). Anal. Calcd for C<sub>32</sub>H<sub>57</sub>B<sub>9</sub>N<sub>3</sub>Ta (**4**): C, 50.81; H, 7.62; N, 5.39. Found: C, 50.43; H, 7.54; N, 5.51.

**X-ray Structure Determination.** Single crystals were immersed in Paraton-N oil and sealed under N<sub>2</sub> in thin-walled glass capillaries. All data were collected at 293 K on a Bruker SMART 1000 CCD diffractometer using Mo-Kα radiation. An empirical absorption correction was applied using the SADABS program.<sup>4</sup> All structures were solved by direct methods and subsequent Fourier difference techniques and refined anisotropically for all non-hydrogen atoms by full-matrix least squares calculations on *F*<sup>2</sup> using the SHELXTL program package.<sup>5</sup> All hydrogen atoms were geometrically fixed using the riding model. Crystal data and details of data collection and refinement are given in Tables S1.

CCDC 943870 - 943873 for complexes **1** – **4** contain the supplementary crystallographic data. These data can be obtained free of charge via [www.ccdc.cam.ac.uk/conts/retrieving.html](http://www.ccdc.cam.ac.uk/conts/retrieving.html) (or from the Cambridge Crystallographic Data Centre, 12, Union Road, Cambridge CB21EZ, UK; fax: (+44)1223-336-033; or [deposit@ccdc.cam.ac.uk](mailto:deposit@ccdc.cam.ac.uk)).

## References

1. G. L. Juvinall, *J. Am. Chem. Soc.*, 1964, **86**, 4202.
2. (a) B. E. Hoogenboom, O. H. Oldenziel, A. M. van Leusen, *Org. Synth., Coll. Vol. VI* 1988, 987;  
(b) P. C. J. Kamer, R. J. M. Nolte, W. Drenth, *J. Am. Chem. Soc.*, 1988, **110**, 6818.
3. M.-S. Cheung, H.-S. Chan, Z. Xie, *Dalton Trans.*, 2005, 2375.
4. G. M. Sheldrick, SADABS: Program for Empirical Absorption Correction of Area Detector Data. University of Göttingen: Germany, 1996.
5. G. M. Sheldrick, SHELXTL 5.10 for Windows NT: Structure Determination Software Programs. Bruker Analytical X-ray Systems, Inc., Madison, Wisconsin, USA, 1997.

**Table S1. Crystal Data and Summary of Data Collection and Refinement**

|                                               | <b>1</b>                                          | <b>2a</b>                                                         | <b>3a·0.5C<sub>7</sub>H<sub>8</sub></b>                            | <b>4·0.25THF</b>                                                                   |
|-----------------------------------------------|---------------------------------------------------|-------------------------------------------------------------------|--------------------------------------------------------------------|------------------------------------------------------------------------------------|
| formula                                       | C <sub>2</sub> H <sub>29</sub> B <sub>9</sub> NTa | C <sub>21</sub> H <sub>42</sub> B <sub>9</sub> N <sub>2</sub> OTa | C <sub>30.5</sub> H <sub>51</sub> B <sub>9</sub> N <sub>3</sub> Ta | C <sub>33</sub> H <sub>59</sub> B <sub>9</sub> N <sub>3</sub> O <sub>0.25</sub> Ta |
| crystal size (mm)                             | 0.40x0.30x0.20                                    | 0.40x0.30x0.20                                                    | 0.50x0.40x0.30                                                     | 0.50x0.40x0.30                                                                     |
| fw                                            | 429.57                                            | 616.81                                                            | 737.98                                                             | 780.07                                                                             |
| crystal system                                | monoclinic                                        | orthorhombic                                                      | triclinic                                                          | monoclinic                                                                         |
| space group                                   | <i>P</i> 2 <sub>1</sub> / <i>c</i>                | <i>P</i> bca                                                      | <i>P</i> (-1)                                                      | <i>P</i> 2 <sub>1</sub> / <i>c</i>                                                 |
| <i>a</i> , Å                                  | 12.998(1)                                         | 14.759(2)                                                         | 8.896(1)                                                           | 22.280(2)                                                                          |
| <i>b</i> , Å                                  | 17.412(1)                                         | 18.933(3)                                                         | 10.812(1)                                                          | 20.164 (2)                                                                         |
| <i>c</i> , Å                                  | 18.024(1)                                         | 19.809(3)                                                         | 18.188(1)                                                          | 20.630(2)                                                                          |
| <i>α</i> , deg                                | 90                                                | 90                                                                | 92.057(2)                                                          | 90                                                                                 |
| <i>β</i> , deg                                | 98.188(2)                                         | 90                                                                | 100.241(1)                                                         | 111.047(2)                                                                         |
| <i>γ</i> , deg                                | 90                                                | 90                                                                | 90.513(1)                                                          | 90                                                                                 |
| <i>V</i> , Å <sup>3</sup>                     | 4037.5(5)                                         | 5534.9(13)                                                        | 1720.2(2)                                                          | 8649.6(14)                                                                         |
| <i>Z</i>                                      | 8                                                 | 8                                                                 | 2                                                                  | 8                                                                                  |
| <i>D</i> <sub>calcd</sub> , Mg/m <sup>3</sup> | 1.413                                             | 1.480                                                             | 1.425                                                              | 1.198                                                                              |
| radiation (λ), Å                              | 0.71073                                           | 0.71073                                                           | 0.71073                                                            | 0.71073                                                                            |



| $2\theta$ range, deg     | 3.2 to 50.5 | 4.0 to 50.5 | 3.8 to 50.5 | 2.8 to 50.5 |
|--------------------------|-------------|-------------|-------------|-------------|
| $\mu$ , mm <sup>-1</sup> | 5.429       | 3.989       | 3.221       | 2.566       |
| $F(000)$                 | 1664        | 2464        | 746         | 3184        |
| no. of obsd reflns       | 7254        | 5010        | 6161        | 15568       |
| no. of params refnd      | 361         | 307         | 397         | 856         |
| goodness of fit          | 1.057       | 1.086       | 1.080       | 1.010       |
| R1                       | 0.025       | 0.050       | 0.034       | 0.053       |
| wR2                      | 0.059       | 0.130       | 0.087       | 0.154       |

---
